# Supplementary material for: Using targeted enrichment of nuclear genes to increase phylogenetic resolution in the neotropical rain forest genus Inga (Leguminosae: Mimosoideae)
Source: Front Plant Sci. 2015 Sep 17;6:710. doi: 10.3389/fpls.2015.00710 (PMC4584976; doi:10.3389/fpls.2015.00710)
Supplement: Supplementary Table 1 — Annotation of the Inga loci selected for targeted enrichment. [file Table1.XLS]

## Sheet: Sheet1
locus type	reference_transcriptome_name	total_reads	percent_reads_from_umbellifera	percent_reads_from_spectabilis	percent_reads_from_sapindoides	Soy_hit	E_value_soy_hit	Soy_EC	Soy_descr	number_of_introns_in_matched_section_of_Soy_gene	bp_of_intron_sequence_in_matched_section_of_Soy_gene	%ID_umbellifera_to_spectabilis	overlap_length_umbellifera_to_spectabilis	%ID_umbellifera_to_sapindoides	overlap_length_umbellifera_to_sapindoides	%ID_spectabilis_to_sapindoides	overlap_length_spectabilis_to_sapindoides	in cleaned-up reference?
diffexp	comp1072929_c0_seq1	33	0	93.94	6.06	Glyma09g03460.1	4e-122	2.7.7.58	(2,3-dihydroxybenzoyl)adenylate Synthase.	1	1565							yes
diffexp	comp1160393_c0_seq1	28	17.01	6.92	76.07	Glyma13g43870.5	7e-122	3.6.3.30	Fe(3+)-transporting ATPase.	1	1101							yes
diffexp	comp1313186_c0_seq1	17	0	0	100	Glyma05g05460.1	1e-93	1.4.1.4	Glutamate Dehydrogenase (NADP(+)).	3	2790							yes
diffexp	comp1560296_c0_seq1	14	75.46	0	24.54	Glyma02g07940.1	1e-42	1.4.1.4	Glutamate Dehydrogenase (NADP(+)).	3	1964							yes
diffexp	comp15827_c0_seq1	12	0	0	100	Glyma14g32500.1	6e-58	1.4.1.13	Glutamate Synthase (NADPH).	1	750							yes
diffexp	comp1585458_c0_seq1	15	100	0	0	Glyma05g38260.1	1e-63	1.1.1.105	Retinol Dehydrogenase.	2	1191							yes
diffexp	comp1771791_c0_seq1	20	78.68	8.53	12.79	Glyma15g11290.1	6e-88	3.2.1.108	Lactase.	3	486							yes
diffexp	comp19402_c0_seq1	1494	7.79	75.26	16.95	Glyma05g25970.1	4e-76	2.3.1.165	6-methylsalicylic Acid Synthase.	2	3433							yes
diffexp	comp2109528_c0_seq1	7	100	0	0	Glyma02g37080.2	2e-57	2.5.1.54	3-deoxy-7-phosphoheptulonate Synthase.	1	94							yes
diffexp	comp2500263_c0_seq1	6	100	0	0	Glyma02g39320.2	1e-71	6.3.5.4	Asparagine Synthase (glutamine-hydrolyzing).	2	791							yes
diffexp	comp26820_c0_seq1	564	0.87	0	99.13	Glyma10g35560.1	2e-47	4.2.3.5	Chorismate Synthase.	3	11003							yes
diffexp	comp26820_c2_seq1	135	0	0	100	Glyma10g35560.2	6e-44	4.2.3.5	Chorismate Synthase.	3	2041							yes
diffexp	comp27108_c0_seq1	29	28.13	58.8	13.07	Glyma08g36350.1	2e-71	4.3.3.2	Strictosidine Synthase.	2	7670							yes
diffexp	comp27108_c0_seq2	19	6.4	57.2	36.4	Glyma16g12090.1	9e-74	4.3.3.2	Strictosidine Synthase.	2	8051							removed
diffexp	comp27375_c0_seq1	10	55.16	26.91	17.94	Glyma02g12660.1	1e-56	3.2.1.17	Lysozyme.	1	1282							yes
diffexp	comp2794198_c0_seq1	5	0	100	0	Glyma11g37250.2	2e-40	3.5.1.5	Urease.	1	78							yes
diffexp	comp30427_c0_seq1	134	42.27	19.93	37.8	Glyma06g41200.1	0	3.2.1.108	Lactase.	9	4424	99.59	488	98.95	287	99.44	359	yes
diffexp	comp31780_c0_seq1	212302	33.83	62.7	3.47	Glyma02g37080.1	0	2.5.1.54	3-deoxy-7-phosphoheptulonate Synthase.	4	2706	98.69	2145	98.72	2257	99.35	2150	yes
diffexp	comp36654_c0_seq1	41	0	100	0	Glyma10g34150.3	2e-50	1.1.1.82	Malate Dehydrogenase (NADP(+)).	3	1389							yes
diffexp	comp36900_c2_seq1	200	0	28	72	Glyma16g22640.1	2e-125	1.1.1.41	Isocitrate Dehydrogenase (NAD(+)).	2	1477							yes
diffexp	comp37261_c0_seq1	26719	31	51.81	17.19	Glyma07g32850.1	0	1.14.19.2	Acyl-[acyl-carrier-protein] Desaturase.	2	3930							yes
diffexp	comp37293_c0_seq1	20095	74.22	21.83	3.95	Glyma18g13630.1	6e-61	4.5.1.3	Dichloromethane Dehalogenase.	2	809							yes
diffexp	comp38281_c0_seq1	267	59.75	17.96	22.29	Glyma02g11020.1	1e-109	5.3.99.6	Allene-oxide Cyclase.	1	1320	98.18	769	98.46	781	99.22	902	yes
diffexp	comp39051_c0_seq2	462	39.91	23.84	36.25	Glyma03g22930.2	5e-48	3.5.2.17	Hydroxyisourate Hydrolase.	2	1663	94.42	1182	84.56	1036	98.84	1558	yes
diffexp	comp40592_c0_seq5	46943	99.81	0.07	0.12	Glyma11g33260.1	2e-122	4.5.1.3	Dichloromethane Dehalogenase.	2	1903							yes
diffexp	comp41267_c0_seq2	1173237	15.14	78.18	6.67	Glyma13g07610.1	5e-82	4.1.1.39	Ribulose-bisphosphate Carboxylase.	2	484	98.54	889	98.43	889	99.25	933	yes
diffexp	comp41859_c0_seq1	7083	27.4	56.53	16.07	Glyma05g34420.1	0	1.2.1.11	Aspartate-semialdehyde Dehydrogenase.	6	3243	99.1	1440	99.09	1422	99.16	1432	yes
diffexp	comp41904_c0_seq1	7260	41.62	34.32	24.06	Glyma10g06590.1	0	1.1.1.41	Isocitrate Dehydrogenase (NAD(+)).	7	8953	99.3	1582	99.37	1598	99.56	1581	yes
diffexp	comp42092_c0_seq1	529	13.82	74.21	11.97	Glyma08g40270.1	0	3.5.1.14	Aminoacylase.	4	3969	99.21	757	99.41	1192	99.21	757	yes
diffexp	comp42092_c0_seq2	172	4.26	83.05	12.69	Glyma18g17470.1	1e-70	3.5.1.14	Aminoacylase.	2	1059	99.21	757	99.41	1192	99.21	757	removed
diffexp	comp42274_c0_seq1	221	38.72	32.74	28.54	Glyma13g00910.1	1e-106	4.1.1.39	Ribulose-bisphosphate Carboxylase.	2	1299							yes
diffexp	comp42358_c0_seq1	1350	3.26	3.83	92.91	Glyma11g33280.1	8e-141	4.1.1.25	Tyrosine Decarboxylase.	3	3477							yes
diffexp	comp42358_c0_seq2	129	0	1.55	98.45	Glyma11g33280.2	9e-55	4.1.1.25	Tyrosine Decarboxylase.	1	148							removed
diffexp	comp42471_c0_seq1	170903	5.6	39.36	55.03	Glyma04g01380.1	0	1.3.1.45	2'-hydroxyisoflavone Reductase.	5	4162	98.85	1127	98.58	1129	98.08	1301	yes
diffexp	comp42557_c0_seq1	15643	29.26	58.31	12.43	Glyma06g46550.1	0	4.3.3.2	Strictosidine Synthase.	3	3331							yes
diffexp	comp43262_c0_seq1	14248	16.85	70.59	12.56	Glyma05g04520.1	0	1.1.1.27	L-lactate Dehydrogenase.	1	1859							yes
diffexp	comp43405_c0_seq1	8330	44.24	43.54	12.22	Glyma07g17180.1	0	3.1.3.11	Fructose-bisphosphatase.	3	1047	98.02	1618	98.7	1618	98.1	1736	yes
diffexp	comp43426_c1_seq1	740	12.66	73.62	13.72	Glyma18g12090.1	8e-104	4.2.1.20	Tryptophan Synthase.	2	1540							yes
diffexp	comp43486_c0_seq1	236967	82.77	16.75	0.48	Glyma16g28970.2	2e-97	3.2.1.17	Lysozyme.	1	378							yes
diffexp	comp43995_c0_seq2	473	4.38	89.74	5.87	Glyma05g34250.1	5e-155	2.4.1.227	Acetylglucosaminyltransferase.	2	3186							yes
diffexp	comp44212_c0_seq1	355	83.85	0	16.15	Glyma16g28970.1	9e-75	3.2.1.17	Lysozyme.	1	378							yes
diffexp	comp44244_c0_seq1	625	45.39	13.76	40.85	Glyma12g05830.1	0	3.2.1.108	Lactase.	11	2884	99.15	1172	98.61	1082	99.08	1199	yes
diffexp	comp44244_c0_seq9	7	0	0	100	Glyma11g13860.1	3e-14	3.2.1.108	Lactase.	1	4833	99.15	1172	98.61	1082	99.08	1199	removed
diffexp	comp44503_c0_seq2	33070	12.81	76.6	10.59	Glyma08g28750.1	4e-92	5.3.99.6	Allene-oxide Cyclase.	2	542							yes
diffexp	comp44503_c0_seq4	19948	7.78	81.21	11.01	Glyma18g51600.1	4e-70	5.3.99.6	Allene-oxide Cyclase.	2	572							removed
diffexp	comp44887_c0_seq1	2789	13.33	79.61	7.06	Glyma06g12120.1	0	3.5.1.14	Aminoacylase.	4	7817	95.3	1405	95.24	1492	99.31	1730	yes
diffexp	comp44921_c0_seq1	18721	76.18	11.16	12.66	Glyma10g37180.1	0	4.1.1.25	Tyrosine Decarboxylase.	3	1786	98.24	1530	98.44	1472	98.98	1472	yes
diffexp	comp45125_c0_seq2	740	24.13	74.33	1.55	Glyma12g25740.1	2e-143	3.2.1.17	Lysozyme.	1	31							yes
diffexp	comp45867_c0_seq1	3814	32.02	34.31	33.67	Glyma11g08920.1	0	1.1.1.41	Isocitrate Dehydrogenase (NAD(+)).	3	4161	99.61	1019	99.51	1019	99.32	1027	yes
diffexp	comp46270_c0_seq1	11941	36.04	49.83	14.13	Glyma08g08910.1	0	2.3.1.165	6-methylsalicylic Acid Synthase.	7	7791	99.5	1995	99.22	2047	99.35	1987	yes
diffexp	comp46270_c0_seq3	3297	4.7	78.62	16.69	Glyma08g08910.2	3e-120	2.3.1.165	6-methylsalicylic Acid Synthase.	1	252	99.5	1995	99.22	2047	99.35	1987	removed
diffexp	comp46275_c0_seq1	7096	30.46	50.1	19.44	Glyma14g00500.1	0	1.1.1.41	Isocitrate Dehydrogenase (NAD(+)).	2	157							yes
diffexp	comp46303_c0_seq1	9271	52.15	33.47	14.39	Glyma19g28770.2	0	1.4.1.4	Glutamate Dehydrogenase (NADP(+)).	9	8053	98.78	1970	98.53	1972	98.48	1976	yes
diffexp	comp46472_c0_seq1	57678	12.87	55.65	31.47	Glyma16g34450.1	0	4.1.1.25	Tyrosine Decarboxylase.	5	2581	97.74	1951	97.51	1964	98.77	1948	yes
diffexp	comp46489_c0_seq1	43887	66.16	24.55	9.29	Glyma16g29960.1	0	2.3.1.160	Vinorine Synthase.	1	1937	97.63	1859	97.64	1908	97.85	1904	yes
diffexp	comp46553_c1_seq1	11059	33.47	63.45	3.09	Glyma20g00230.1	0	3.5.1.14	Aminoacylase.	3	3955	98.55	1591	99.08	1632	98.27	1621	yes
diffexp	comp46693_c0_seq1	607	36.09	32.11	31.8	Glyma10g37200.1	9e-136	3.2.1.17	Lysozyme.	0	0	98.64	1027	99.39	983	98.48	990	yes
diffexp	comp46777_c0_seq1	5935	37.07	41.04	21.89	Glyma04g37000.1	0	5.5.1.9	Cycloeucalenol Cycloisomerase.	6	3720	99.26	1216	98.85	1216	99.46	1293	yes
diffexp	comp47631_c0_seq1	715	60.16	17.5	22.34	Glyma09g33650.1	0	4.1.1.49	Phosphoenolpyruvate Carboxykinase (ATP).	11	5759	99.11	1343	98.68	906	98.81	922	yes
diffexp	comp47751_c0_seq1	8610	75.51	18.61	5.87	Glyma19g31430.1	0	3.13.1.1	UDP-sulfoquinovose Synthase.	1	535							yes
diffexp	comp48120_c0_seq1	769	15.38	72.62	12	Glyma14g27990.1	0	1.14.19.2	Acyl-[acyl-carrier-protein] Desaturase.	1	1860							yes
diffexp	comp48138_c0_seq1	1461	73.05	7.39	19.56	Glyma16g24420.1	0	1.2.1.24	Succinate-semialdehyde Dehydrogenase.	9	2192	99.07	1721	99.04	1151	99.29	1120	yes
diffexp	comp48218_c0_seq1	1552	12.01	54.99	33	Glyma11g12440.1	6e-125	1.3.1.45	2'-hydroxyisoflavone Reductase.	6	2163	97.87	1176	97.86	1213	98.35	1276	yes
diffexp	comp48510_c0_seq6	254	7.64	80.72	11.64	Glyma13g07660.1	5e-68	5.3.1.8	Mannose-6-phosphate Isomerase.	1	1694							yes
diffexp	comp48566_c2_seq1	1604	52.24	42.7	5.06	Glyma05g27250.1	0	1.13.11.51	9-cis-epoxycarotenoid Dioxygenase.	0	0	99.44	1599	99.26	1896	99.69	1599	yes
diffexp	comp48873_c0_seq1	3355	26.68	49.73	23.59	Glyma13g02870.1	0	3.5.1.14	Aminoacylase.	3	7960	99.26	1762	98.98	1761	99.13	1849	yes
diffexp	comp49083_c0_seq1	25919	42.95	45.65	11.4	Glyma07g11310.1	0	3.2.1.108	Lactase.	10	2766	98.72	1956	98.93	1771	99.22	1929	yes
diffexp	comp49369_c0_seq1	66373	48.81	44.49	6.7	Glyma04g09520.1	0	1.2.1.70	Glutamyl-tRNA Reductase.	2	625	98.46	2334	98.58	2322	99.63	2442	yes
diffexp	comp49395_c0_seq1	5560	32.15	52.3	15.55	Glyma17g03500.1	0	2.7.7.58	(2,3-dihydroxybenzoyl)adenylate Synthase.	2	4226	98.65	1923	98.44	1993	98.83	1877	yes
diffexp	comp49523_c1_seq1	2662	71.32	15.24	13.44	Glyma07g30350.1	0	1.2.1.70	Glutamyl-tRNA Reductase.	2	2329	98.98	1370	98.61	1371	98.86	1403	yes
diffexp	comp50204_c0_seq1	22915	18.73	55.6	25.67	Glyma06g43050.1	0	4.1.1.31	Phosphoenolpyruvate Carboxylase.	9	4948	99.2	3493	99.38	3382	99.5	3389	yes
diffexp	comp50626_c0_seq4	11038	45.53	36.13	18.34	Glyma14g03410.2	0	1.13.11.27	4-hydroxyphenylpyruvate Dioxygenase.	1	1808							yes
diffexp	comp50758_c0_seq4	47	70.44	9.24	20.32	Glyma15g18270.1	1.7	1.1.1.267	1-deoxy-D-xylulose-5-phosphate Reductoisomerase.	0	0	96.24	1010	96.83	884	98.07	1189	yes
diffexp	comp50780_c0_seq2	5980	25.13	64.43	10.44	Glyma09g34470.1	0	1.3.1.45	2'-hydroxyisoflavone Reductase.	3	4760							yes
diffexp	comp51015_c0_seq1	6599	41.71	27.05	31.24	Glyma18g04940.1	0	4.1.1.25	Tyrosine Decarboxylase.	6	11264	98.53	1899	98.6	1572	99.43	1571	yes
diffexp	comp51118_c0_seq1	13352	27.83	21.1	51.07	Glyma06g41410.1	0	2.7.7.49	RNA-directed DNA Polymerase.	2	4914							yes
diffexp	comp51236_c3_seq1	33423	57.42	34.56	8.03	Glyma08g19360.1	0	4.1.1.25	Tyrosine Decarboxylase.	4	2108	98.56	2159	98.56	2218	99.08	2177	yes
diffexp	comp51289_c0_seq1	24892	29.21	44.09	26.7	Glyma18g03840.1	0	2.7.7.33	Glucose-1-phosphate Cytidylyltransferase.	3	1922							yes
diffexp	comp51314_c1_seq5	1275	0.19	99.65	0.16	Glyma0317s00200.1	0	1.3.1.45	2'-hydroxyisoflavone Reductase.	3	363							yes
diffexp	comp51335_c0_seq1	11314	37.13	40.06	22.81	Glyma03g33830.1	0	4.1.1.19	Arginine Decarboxylase.	8	11037	98.59	1911	98.62	1879	98.59	1911	yes
diffexp	comp51566_c0_seq1	53842	67.42	24.51	8.08	Glyma04g00960.1	0	4.1.1.19	Arginine Decarboxylase.	0	0	98.4	3053	98.8	2838	99.01	2842	yes
diffexp	comp51608_c0_seq1	9667	19.31	44.45	36.24	Glyma18g02060.1	0	6.3.5.4	Asparagine Synthase (glutamine-hydrolyzing).	13	4352	97.37	3307	97.42	1941	99.26	2034	yes
diffexp	comp51641_c0_seq2	11461	36.91	43.71	19.38	Glyma08g41960.1	3e-126	4.5.1.3	Dichloromethane Dehalogenase.	2	1304							yes
diffexp	comp51757_c0_seq1	8017	44.08	30.95	24.97	Glyma15g41690.1	0	1.2.1.24	Succinate-semialdehyde Dehydrogenase.	19	15657	98.95	2192	98.75	2243	99.37	2213	yes
diffexp	comp52112_c0_seq3	516	54.01	29.79	16.2	Glyma07g03230.1	0	2.7.1.30	Glycerol Kinase.	2	1157							yes
diffexp	comp52180_c0_seq2	1989	16.66	49	34.34	Glyma20g30620.1	0	3.1.3.11	Fructose-bisphosphatase.	12	8000	97.4	1346	97.39	1343	98.75	1514	yes
diffexp	comp52686_c0_seq2	857	36.63	22.17	41.19	Glyma20g03040.1	0	6.3.5.4	Asparagine Synthase (glutamine-hydrolyzing).	11	12648	99.39	1795	99.12	1712	99.19	2348	yes
diffexp	comp52736_c0_seq1	687	50.14	46.56	3.3	Glyma03g28590.1	5e-150	4.3.3.2	Strictosidine Synthase.	2	3424							yes
diffexp	comp52736_c0_seq2	4465	34.12	61.29	4.59	Glyma19g31330.1	0	4.3.3.2	Strictosidine Synthase.	2	2440							combined with comp52736_c0_seq1
diffexp	comp52981_c1_seq1	5052	42.99	30.38	26.63	Glyma13g18960.1	0	3.6.3.43	Peptide-transporting ATPase.	11	16114	99.05	3062	99.64	3022	99.37	4420	yes
diffexp	comp53258_c0_seq3	7790	49.19	30.55	20.26	Glyma02g42430.1	0	3.1.4.11	Phosphoinositide Phospholipase C.	8	2803	97.75	1957	97.96	1956	98.93	2060	yes
diffexp	comp53595_c0_seq19	5630	5.83	75.7	18.46	Glyma16g08930.1	1e-160	3.5.2.17	Hydroxyisourate Hydrolase.	5	10460	94.42	1182	84.56	1036	98.84	1558	removed
diffexp	comp53595_c0_seq20	6470	1.54	81	17.46	Glyma16g08930.2	4e-145	3.5.2.17	Hydroxyisourate Hydrolase.	5	10460	94.42	1182	84.56	1036	98.84	1558	yes
diffexp	comp53857_c0_seq1	13361	17.27	55.76	26.96	Glyma20g09810.1	0	4.1.1.31	Phosphoenolpyruvate Carboxylase.	9	4321	99.51	2029	99.31	2029	99.22	2310	yes
diffexp	comp53868_c0_seq1	28840	19.06	48.31	32.63	Glyma03g28410.2	0	1.4.1.13	Glutamate Synthase (NADPH).	34	50449	98.63	4595	99.26	4439	99.41	5562	yes
diffexp	comp53904_c0_seq1	2586	24.38	58.61	17.01	Glyma07g30110.1	0	3.1.3.11	Fructose-bisphosphatase.	2	1500	98.17	1475	97.77	1432	98.26	1491	yes
diffexp	comp53978_c0_seq1	6279	35.12	26.03	38.85	Glyma08g00490.1	0	1.2.1.24	Succinate-semialdehyde Dehydrogenase.	11	5979	98.43	1916	98.45	1876	98.95	1910	yes
diffexp	comp54072_c0_seq2	1603	60.14	19.38	20.48	Glyma08g17470.1	0	5.5.1.8	Bornyl Diphosphate Synthase.	11	3508	98.47	2411	98.7	2377	98.94	2645	yes
diffexp	comp54453_c0_seq1	13746	24.2	38.67	37.12	Glyma20g22760.1	0	5.4.2.3	Phosphoacetylglucosamine Mutase.	7	2236	98.68	1818	98.37	1843	98.92	1852	yes
diffexp	comp54484_c0_seq1	7242	5.2	89.83	4.98	Glyma02g04800.1	2e-143	4.3.3.2	Strictosidine Synthase.	3	3495	97.83	1430	95.97	1439	96.77	1486	yes
diffexp	comp546012_c0_seq1	75	1.64	98.36	0	Glyma01g41920.1	2e-123	1.1.1.27	L-lactate Dehydrogenase.	1	447							yes
diffexp	comp54952_c0_seq1	6893	37.79	34.64	27.57	Glyma02g10060.1	0	6.1.1.20	Phenylalanine--tRNA Ligase.	9	7891	98.02	1972	98.64	1907	97.63	1984	yes
diffexp	comp55300_c0_seq3	2451	46.26	27.92	25.83	Glyma10g02370.1	0	3.6.3.43	Peptide-transporting ATPase.	7	8673	98.67	1962	99.05	2100	99.27	4929	yes
diffexp	comp55873_c0_seq1	812	8.79	73.04	18.17	Glyma14g37290.1	0	3.1.4.11	Phosphoinositide Phospholipase C.	8	4243	96.85	572	97.45	706	98.67	1731	yes
diffexp	comp56022_c2_seq1	1971	34.72	40.42	24.86	Glyma10g04680.1	0	2.3.1.165	6-methylsalicylic Acid Synthase.	13	2949	99.28	1393	98.07	1551	97.94	1799	yes
diffexp	comp56609_c0_seq25	26	13.83	63.69	22.48	Glyma01g06720.1	4e-59	3.2.1.17	Lysozyme.	1	1200							removed
diffexp	comp56747_c1_seq2	3608	85.71	7.26	7.03	Glyma11g14160.1	4e-93	1.2.1.24	Succinate-semialdehyde Dehydrogenase.	3	1857							yes
diffexp	comp710440_c0_seq1	33	0	100	0	Glyma12g33820.1	2e-126	4.1.1.31	Phosphoenolpyruvate Carboxylase.	3	2632							yes
diffexp	comp816108_c0_seq1	26	100	0	0	Glyma16g10880.2	9e-48	1.1.1.267	1-deoxy-D-xylulose-5-phosphate Reductoisomerase.	3	1271							yes
phylog	comp36008_c0_seq1	20021	28.41	55.44	16.16	Glyma20g02110.2	9e-54	No_soy_EC	Small molecular heat shock protein	1	130	99.08	653	99.23	653	97.82	916	yes
phylog	comp37141_c0_seq1	177329	38.14	53.07	8.79	Glyma07g02240.2	9e-62	No_soy_EC	Photosystem I psaH protein	2	614	98.22	674	98.02	707	98.37	673	yes
phylog	comp38882_c0_seq1	6599	42.22	34.47	23.31	Glyma17g02200.1	3e-87	No_soy_EC	30S ribosomal protein S8	2	756	98.85	694	98.54	615	98.37	614	yes
phylog	comp39332_c0_seq1	29404	42.17	48.77	9.07	Glyma08g04690.2	2e-96	No_soy_EC	40S ribosomal protein S15	1	582	97.72	878	95.98	1021	96.68	904	yes
phylog	comp39487_c0_seq1	48199	43.89	42.14	13.97	Glyma18g01870.1	3e-89	No_soy_EC	Histone H3	3	264	97.96	785	98.57	837	98.34	785	yes
phylog	comp40615_c0_seq1	3427	39.06	46.98	13.96	Glyma11g08750.1	8e-101	No_soy_EC	Cellular retinaldehyde-binding/triple function, C-terminal	2	805	98.12	1062	98.48	1053	97.82	1101	yes
phylog	comp41024_c0_seq1	14598	26.93	61.83	11.24	Glyma08g47990.1	5e-60	No_soy_EC	Plastid-specific 30S ribosomal protein 3,	1	79	97.72	966	97.61	922	98.01	1007	yes
phylog	comp42391_c0_seq1	15851	32.02	62.29	5.69	Glyma17g35360.1	1e-150	3.1.1.24	3-oxoadipate Enol-lactonase.	1	97	97.44	1252	96.7	1212	97.77	1572	yes
phylog	comp42706_c0_seq1	10130	40.14	37.28	22.58	Glyma15g40810.1	2e-95	No_soy_EC	Inhibitor of apoptosis-like protein	2	322	98.19	1434	98.84	1385	98.48	1386	yes
phylog	comp43316_c0_seq1	8056	39.23	47.99	12.78	Glyma08g25990.1	5e-81	No_soy_EC	50S ribosomal protein L18 family	1	475	97.67	814	98.59	853	97.54	814	yes
phylog	comp43396_c0_seq1	484	41.28	19.64	39.08	Glyma13g19950.1	2e-58	No_soy_EC	Fiber NTGP1-related protein	1	537	98.96	386	98.45	386	97.99	497	yes
phylog	comp44391_c1_seq1	701	26.68	47.98	25.34	Glyma19g05120.2	2e-70	1.1.1.44	Phosphogluconate Dehydrogenase (decarboxylating).	1	836	99.32	881	96.15	909	96.76	1110	yes
phylog	comp44856_c1_seq1	764	28.07	16.12	55.81	Glyma18g53100.2	9e-45	3.1.3.4	Phosphatidate Phosphatase.	2	791	99.16	1187	99.45	727	98.22	843	yes
phylog	comp45038_c0_seq1	373766	25.51	64.89	9.6	Glyma19g37000.1	2e-134	No_soy_EC	Water-selective transport intrinsic membrane protein	2	941	97.44	1368	97.46	1380	97.93	1452	yes
phylog	comp45170_c0_seq2	31082	26.09	69.38	4.53	Glyma08g16370.1	2e-94	No_soy_EC	Thylakoid lumenal 19 kDa protein, chloroplast,	1	419	96.11	1028	95.16	1136	97.67	1030	yes
phylog	comp46036_c0_seq1	2918	40.48	40.29	19.23	Glyma16g33160.2	7e-66	No_soy_EC	Ribosomal protein L2	1	574	98.66	1047	97.84	973	98.34	963	yes
phylog	comp46048_c0_seq1	165	29.58	31.49	38.93	Glyma04g27580.1	2e-92	1.6.5.2	NAD(P)H Dehydrogenase (quinone).	2	674	91.94	484	89.41	595	93.84	552	yes
phylog	comp46121_c0_seq1	10535	28.44	52.22	19.34	Glyma03g16510.1	3e-94	No_soy_EC	Universal stress protein family protein	3	689	98.1	949	98.22	953	98.05	973	yes
phylog	comp46343_c0_seq1	311	27.04	50.68	22.29	Glyma06g48310.1	2e-51	2.7.1.74	Deoxycytidine Kinase.	1	77	98.98	295	97.96	294	98.3	294	yes
phylog	comp48212_c0_seq2	1916	37.55	43	19.46	Glyma17g09490.1	1e-66	No_soy_EC	Polyphosphoinositide binding protein	2	749	98.48	1117	98.33	1140	98.44	1153	yes
phylog	comp48513_c0_seq2	155	33.48	10.28	56.24	Glyma12g02270.1	1e-70	2.7.1.86	NADH Kinase.	1	744	99.52	416	98.53	408	95.96	470	yes
phylog	comp49109_c0_seq4	1466	37.02	37.46	25.52	Glyma07g30060.3	4e-65	No_soy_EC	Putative antigen receptor	1	662	98.04	970	98.6	928	98.36	973	yes
phylog	comp49673_c0_seq1	23632	27.16	52.49	20.36	Glyma06g04580.1	2e-123	No_soy_EC	D3-type cyclin	3	307	96.36	1979	97.46	1927	97.6	1916	yes
phylog	comp49673_c0_seq2	22763	27.52	49.82	22.66	Glyma04g04460.1	7e-124	No_soy_EC	G1/S-specific cyclin D	3	286	96.36	1979	97.46	1927	97.6	1916	removed
phylog	comp50170_c0_seq12	2400	25.39	36.04	38.58	Glyma12g30960.3	2e-167	No_soy_EC	Esterase/lipase/thioesterase family protein	3	634	98.17	1199	98.19	1217	98.02	1260	yes
phylog	comp50657_c0_seq1	4027	41.42	38.05	20.53	Glyma12g02820.5	4e-123	No_soy_EC	Nucleolar essential protein	3	800	97.72	1401	98.38	1299	98.25	1314	yes
phylog	comp51262_c0_seq4	2942	28.27	43.14	28.59	Glyma15g01920.1	2e-149	1.1.1.79	Glyoxylate Reductase (NADP(+)).	1	996	98.03	1424	97.3	1484	98.17	1423	yes
phylog	comp51482_c0_seq2	48281	38.56	52.59	8.85	Glyma05g33700.1	0	2.7.11.1	Non-specific Serine/threonine Protein Kinase.	1	340	97.53	1980	99.05	2645	98.05	2000	yes
phylog	comp51744_c1_seq15	2020	26.23	20.29	53.48	Glyma12g36170.1	4e-115	2.7.10.2	Non-specific Protein-tyrosine Kinase.	3	711	97.88	1036	98.15	1027	98.05	1025	yes
phylog	comp52070_c1_seq13	111	35.2	52.18	12.62	Glyma06g16820.1	8e-75	No_soy_EC	R2r3-myb transcription factor,	2	379	93.63	581	97.77	627	96.09	512	yes
phylog	comp52070_c1_seq14	75	25.01	67.36	7.63	Glyma12g03600.1	1e-42	No_soy_EC	MYB transcription factor	1	890	93.63	581	97.77	627	96.09	512	removed
phylog	comp52070_c1_seq15	54	26.01	58.14	15.86	Glyma11g11450.1	2e-59	No_soy_EC	R2R3 Myb4a C2 repressor motif protein	1	869	93.63	581	97.77	627	96.09	512	removed
phylog	comp52829_c0_seq3	467	26.06	61.92	12.02	Glyma08g26320.1	8e-58	2.1.1.34	TRNA Guanosine-2'-O-methyltransferase.	2	679	98.58	1409	98.31	1417	98.01	1460	yes
phylog	comp53216_c0_seq2	1803	33.27	43.43	23.3	Glyma10g34420.1	7e-97	No_soy_EC	Phytol kinase 2	3	432	97.57	1685	97.88	1748	98.4	1684	yes
phylog	comp53516_c0_seq1	2425	40.38	42.09	17.54	Glyma07g02480.1	3e-61	No_soy_EC	Chaperone protein dnaJ 8, chloroplast	2	377	94.05	1294	94.42	1343	97.77	1347	yes
phylog	comp53540_c0_seq3	2734	36.94	33.27	29.79	Glyma06g42820.1	0	3.1.3.12	Trehalose-phosphatase.	1	463	91.83	2289	93.44	2287	98.14	2951	yes
phylog	comp53688_c0_seq1	761	41.31	23.16	35.53	Glyma20g34420.2	0	2.7.13.3	Histidine Kinase.	3	449	99.25	1205	99.27	1239	91.44	2441	yes
phylog	comp53952_c0_seq2	591	32.64	26.69	40.67	Glyma13g44280.1	2e-155	2.7.11.1	Non-specific Serine/threonine Protein Kinase.	1	78	98.61	937	97.67	816	97.3	816	yes
phylog	comp55182_c0_seq2	524	41.17	25.01	33.82	Glyma10g39830.1	3e-134	No_soy_EC	Pyruvate orthophosphate dikinase regulatory protein	2	579	98.64	1325	97.8	1365	97.68	1335	yes
phylog	comp55228_c0_seq8	795	26.89	53.88	19.23	Glyma12g00380.1	4e-122	No_soy_EC	Proton-dependent oligopeptide transport family protein	1	253	98.45	901	93.92	905	98.21	1287	yes
phylog	comp55479_c0_seq1	1929	37.92	35.93	26.15	Glyma16g34620.1	0	2.7.11.1	Non-specific Serine/threonine Protein Kinase.	3	806	98.53	2173	98.34	2114	98.35	2121	yes
phylog	comp55820_c0_seq1	3293	29.64	24.3	46.07	Glyma02g46270.1	5e-142	No_soy_EC	Zinc finger protein	3	338	98.33	1855	98.54	1854	98.33	1920	yes
phylog	comp55854_c0_seq4	2467	30.82	24.98	44.19	Glyma15g16470.3	2e-86	No_soy_EC	Cullin 1-like protein	3	344	95.75	2543	96.83	2401	97.08	2983	yes
phylog	comp55885_c0_seq14	626	33.18	17.38	49.44	Glyma13g11750.1	7e-49	No_soy_EC	Breast cancer susceptibility protein	3	548	98.33	1378	97.82	1378	97.56	3681	yes
phylog	comp55899_c0_seq1	21711	37.79	49.86	12.35	Glyma08g46110.1	0	3.2.1.73	Licheninase.	1	472	97.7	2131	98.14	2102	97.99	2139	yes
phylog	comp56134_c0_seq6	112	25.12	39.99	34.89	Glyma07g30360.2	1e-62	No_soy_EC	Glutathione-regulated potassium-efflux system protein kefB	2	702	99.35	2449	98.05	2617	97.91	3021	yes
phylog	comp56192_c1_seq2	769	44.57	19.55	35.88	Glyma06g16030.1	0	No_soy_EC	Pentatricopeptide repeat-containing protein	2	71	99.04	1459	99.01	1010	98.4	2380	yes
phylog	comp56254_c1_seq2	6777	33.83	10.26	55.91	Glyma13g04540.1	9e-113	No_soy_EC	Senescence-associated gene	2	844	97.72	1404	96.44	1319	97.3	1484	yes
phylog	comp56606_c0_seq4	3791	44.42	36.76	18.82	Glyma06g00380.1	7e-109	No_soy_EC	alpha/beta-Hydrolases superfamily protein	1	99	95.92	785	92.71	809	94.66	1312	yes
phylog	comp56609_c0_seq1	705	30.13	4.02	65.85	Glyma15g01820.1	1e-76	2.7.11.1	Non-specific Serine/threonine Protein Kinase.	2	180	96.98	430	90.26	575	94.22	329	yes
phylog	comp56733_c0_seq5	7597	34.76	47.21	18.03	Glyma07g40270.1	9e-155	No_soy_EC	Auxin response factor	3	363	98.17	1696	98.65	1700	98.26	2880	yes
phylog	comp56887_c0_seq1	9334	30.03	34.56	35.41	Glyma13g06490.1	0	2.7.10.2	Non-specific Protein-tyrosine Kinase.	1	94	92.58	2897	93.96	2912	96.38	3015	yes
phylog	comp56896_c0_seq1	4849	38.75	37.95	23.3	Glyma13g35230.1	0	1.14.13.30	Leukotriene-B(4) 20-monooxygenase.	1	372	94.13	1738	97.69	1822	94.34	1783	yes
phylog	comp56968_c0_seq5	850	28.37	26.4	45.23	Glyma11g31330.1	1e-111	4.4.1.5	Lactoylglutathione Lyase.	1	563	95.67	646	93.85	1089	94.89	1527	yes
secsyn	comp10344_c0_seq1	27	0	77.78	22.22	Glyma17g37060.1	1e-95	1.1.1.283	Methylglyoxal Reductase (NADPH-dependent).	3	2810							yes
secsyn	comp23076_c0_seq1	601	98.92	1.08	0	Glyma11g06390.1	0	1.14.13.11	Trans-cinnamate 4-monooxygenase.	1	531							yes
secsyn	comp27897_c0_seq1	177069	0	99.36	0.64	Glyma13g04210.1	0	1.14.13.11	Trans-cinnamate 4-monooxygenase.	4	5462							yes
secsyn	comp28617_c0_seq1	56	8.64	10.54	80.81	Glyma12g07190.1	1e-163	1.14.13.11	Trans-cinnamate 4-monooxygenase.	1	933							yes
secsyn	comp28839_c0_seq1	94	27.32	0	72.68	Glyma07g30440.1	0	1.14.99.7	Squalene Monooxygenase.	6	1502							yes
secsyn	comp28983_c0_seq1	33487	3.77	0.92	95.32	Glyma07g00330.1	0	5.4.99.7	Lanosterol Synthase.	15	5784	95.9	1709	94.59	1053	96.58	1053	yes
secsyn	comp30607_c0_seq1	192	81.92	3.97	14.11	Glyma17g33940.2	2e-112	5.4.99.5	Chorismate Mutase.	5	1983							yes
secsyn	comp3174_c0_seq1	27	21.85	56.84	21.31	Glyma17g07170.1	6e-92	6.2.1.2	Butyrate--CoA Ligase.	3	2548							yes
secsyn	comp31767_c0_seq1	4794	93.09	6.74	0.17	Glyma17g13430.1	0	1.14.13.11	Trans-cinnamate 4-monooxygenase.	1	2198							yes
secsyn	comp32261_c0_seq1	22428	29.62	69.33	1.05	Glyma19g27930.1	6e-81	2.3.1.74	Naringenin-chalcone Synthase.	1	2550							yes
secsyn	comp338739_c0_seq1	228	0	100	0	Glyma16g04350.1	3e-133	2.3.1.166	2-alpha-hydroxytaxane 2-O-benzoyltransferase.	0	0							yes
secsyn	comp33962_c0_seq1	2855	0	99.93	0.07	Glyma09g31840.1	1e-179	1.14.13.11	Trans-cinnamate 4-monooxygenase.	1	2415							yes
secsyn	comp35561_c0_seq1	13188	1.03	98.15	0.82	Glyma10g34720.1	9e-138	1.3.1.45	2'-hydroxyisoflavone Reductase.	4	2879	97.8	1229	97.27	1245	98.8	1252	yes
secsyn	comp35797_c0_seq1	71754	4.38	91.83	3.79	Glyma13g02740.1	7e-142	1.14.17.4	Aminocyclopropanecarboxylate Oxidase.	2	5044	97.93	1544	98.06	1547	98.7	1620	yes
secsyn	comp36444_c1_seq1	6845	94.15	5.77	0.08	Glyma19g27930.1	0	2.3.1.74	Naringenin-chalcone Synthase.	1	2550							yes
secsyn	comp36697_c0_seq1	189	89.43	7.93	2.64	Glyma07g09960.1	0	1.14.13.11	Trans-cinnamate 4-monooxygenase.	1	944							yes
secsyn	comp37145_c0_seq1	197006	9.42	87.03	3.55	Glyma11g03010.1	0	1.14.17.4	Aminocyclopropanecarboxylate Oxidase.	1	79							yes
secsyn	comp37377_c0_seq1	8718	0.08	3.7	96.21	Glyma07g20430.1	6e-132	1.14.13.11	Trans-cinnamate 4-monooxygenase.	1	2184							yes
secsyn	comp37644_c0_seq1	4638	98.5	1.27	0.23	Glyma19g27930.1	0	2.3.1.74	Naringenin-chalcone Synthase.	1	2550							yes
secsyn	comp39192_c0_seq1	263596	21.35	72.64	6.01	Glyma02g40290.1	0	1.14.13.11	Trans-cinnamate 4-monooxygenase.	4	7259	99.13	1951	99.19	1983	99.3	1992	yes
secsyn	comp39600_c0_seq2	2042	0.12	97.77	2.11	Glyma07g04470.1	0	1.14.13.11	Trans-cinnamate 4-monooxygenase.	1	2783							yes
secsyn	comp39985_c0_seq4	3070	45.83	38.63	15.55	Glyma08g14980.1	2e-142	2.7.1.71	Shikimate Kinase.	10	8636							yes
secsyn	comp40415_c0_seq2	211	10.29	0.46	89.24	Glyma07g02460.1	4e-115	2.3.1.166	2-alpha-hydroxytaxane 2-O-benzoyltransferase.	1	3335							yes
secsyn	comp40581_c0_seq1	3783	0.97	1.19	97.84	Glyma05g12770.1	0	1.14.17.4	Aminocyclopropanecarboxylate Oxidase.	2	3096							yes
secsyn	comp40678_c0_seq1	429	0	100	0	Glyma12g34390.1	2e-168	1.3.1.77	Anthocyanidin Reductase.	5	4505							yes
secsyn	comp40970_c0_seq1	14069	47.99	51.08	0.93	Glyma08g06630.1	2e-87	1.1.1.283	Methylglyoxal Reductase (NADPH-dependent).	3	2100	97.78	766	97.2	750	99.6	759	yes
secsyn	comp40970_c1_seq1	8575	16.5	82.73	0.77	Glyma08g06630.1	1e-84	1.1.1.283	Methylglyoxal Reductase (NADPH-dependent).	3	2221	97.78	766	97.2	750	99.6	759	yes
secsyn	comp41081_c0_seq1	186335	26.06	73.09	0.85	Glyma06g14820.1	3e-82	5.5.1.6	Chalcone Isomerase.	3	675	97.36	1100	97.43	1402	98.91	1097	yes
secsyn	comp41473_c0_seq1	2648	1.02	79.34	19.64	Glyma01g42350.1	0	1.14.17.4	Aminocyclopropanecarboxylate Oxidase.	1	1826							yes
secsyn	comp41570_c0_seq1	100225	0.18	0.11	99.7	Glyma20g28620.1	0	1.14.13.11	Trans-cinnamate 4-monooxygenase.	1	108							yes
secsyn	comp41589_c0_seq1	57346	37.68	60.8	1.52	Glyma08g06630.1	3e-159	1.1.1.283	Methylglyoxal Reductase (NADPH-dependent).	4	2602							yes
secsyn	comp41658_c0_seq1	69477	35.89	59.95	4.16	Glyma11g08350.1	0	4.2.3.4	3-dehydroquinate Synthase.	8	5716							yes
secsyn	comp41758_c0_seq1	296	36.04	22.05	41.9	Glyma01g01350.1	0	6.2.1.26	O-succinylbenzoate--CoA Ligase.	5	5468	97.68	776	99.41	337	99.32	443	yes
secsyn	comp42265_c0_seq1	56625	7.12	92.48	0.4	Glyma20g37400.1	0	4.2.1.10	3-dehydroquinate Dehydratase.	8	2121							yes
secsyn	comp42703_c0_seq1	8215	0.01	97.16	2.82	Glyma03g02410.1	0	1.14.13.11	Trans-cinnamate 4-monooxygenase.	1	2080							yes
secsyn	comp42737_c0_seq1	35930	64.52	32.83	2.65	Glyma17g05290.1	0	4.2.1.51	Prephenate Dehydratase.	0	0	98	2005	97.23	2059	98.21	2006	yes
secsyn	comp43079_c0_seq1	19465	54.64	38.37	7	Glyma08g14720.1	0	4.4.1.13	Cysteine-S-conjugate Beta-lyase.	9	4436							yes
secsyn	comp43290_c0_seq1	41489	53.32	45.22	1.45	Glyma20g38580.1	6e-85	5.5.1.6	Chalcone Isomerase.	2	1200							yes
secsyn	comp43423_c0_seq1	254	1.93	49.04	49.03	Glyma17g07190.2	0	6.2.1.2	Butyrate--CoA Ligase.	3	3453							yes
secsyn	comp43766_c1_seq1	12883	26.96	70.9	2.14	Glyma02g40290.1	8e-94	1.14.13.11	Trans-cinnamate 4-monooxygenase.	1	1065							yes
secsyn	comp43766_c2_seq1	40173	57.24	41.45	1.31	Glyma02g40290.2	0	1.14.13.11	Trans-cinnamate 4-monooxygenase.	3	4388	99.73	1097	99.13	1148	99.64	1099	yes
secsyn	comp43779_c0_seq1	1065	0.23	69.64	30.13	Glyma19g26660.1	0	2.3.1.166	2-alpha-hydroxytaxane 2-O-benzoyltransferase.	1	804							yes
secsyn	comp43819_c0_seq1	478	3.58	13.51	82.91	Glyma11g20020.2	0	6.2.1.26	O-succinylbenzoate--CoA Ligase.	6	3723							yes
secsyn	comp43866_c0_seq1	507	75.97	5.08	18.95	Glyma03g34760.1	0	1.14.13.11	Trans-cinnamate 4-monooxygenase.	1	1193							yes
secsyn	comp44153_c0_seq1	7809	50.25	30.84	18.91	Glyma19g31230.1	5e-155	1.5.1.2	Pyrroline-5-carboxylate Reductase.	6	4188	98.25	1202	98.49	1194	99.5	1195	yes
secsyn	comp44609_c0_seq1	868048	39.83	59.67	0.5	Glyma19g27930.1	0	2.3.1.74	Naringenin-chalcone Synthase.	1	2550							yes
secsyn	comp44627_c0_seq1	336168	60.84	38.58	0.58	Glyma08g11620.1	0	2.3.1.74	Naringenin-chalcone Synthase.	1	1288							yes
secsyn	comp44802_c0_seq1	4268	55.88	31.77	12.36	Glyma13g05830.1	9e-157	5.4.99.5	Chorismate Mutase.	6	7188							yes
secsyn	comp45310_c0_seq2	11785	0.07	99.64	0.29	Glyma06g03850.1	0	1.14.13.11	Trans-cinnamate 4-monooxygenase.	1	1933							yes
secsyn	comp45467_c0_seq1	18855	0.1	0.14	99.76	Glyma03g02410.1	0	1.14.13.11	Trans-cinnamate 4-monooxygenase.	1	2080							yes
secsyn	comp45684_c0_seq1	12727	20.32	75.47	4.21	Glyma04g03740.1	0	4.2.1.92	Hydroperoxide Dehydratase.	0	0	97.78	1396	98.01	2013	99.1	1448	yes
secsyn	comp45703_c0_seq1	263	7.38	66.75	25.87	Glyma20g33450.1	0	5.4.99.7	Lanosterol Synthase.	14	5649							yes
secsyn	comp45862_c0_seq1	365	49.81	12.17	38.01	Glyma12g31940.1	2e-127	4.2.1.51	Prephenate Dehydratase.	7	4631							yes
secsyn	comp45906_c0_seq1	437	34.74	51.99	13.27	Glyma05g02760.1	3e-147	1.14.13.11	Trans-cinnamate 4-monooxygenase.	1	1994							yes
secsyn	comp45994_c1_seq1	180	2.04	2.77	95.19	Glyma06g21920.1	2e-134	1.14.13.11	Trans-cinnamate 4-monooxygenase.	1	901							yes
secsyn	comp46025_c0_seq1	8935	9.4	86.55	4.05	Glyma04g08070.1	0	1.5.3.1	Sarcosine Oxidase.	0	0	97.89	1420	97	1402	96.46	1469	yes
secsyn	comp46261_c0_seq1	4896	12.32	57.37	30.31	Glyma04g36950.3	0	6.2.1.2	Butyrate--CoA Ligase.	5	7766	97.29	2105	97.29	2104	99.45	2193	yes
secsyn	comp46351_c1_seq1	13396	28.95	61.57	9.48	Glyma12g30660.1	0	4.2.1.51	Prephenate Dehydratase.	0	0	98.69	1297	98.98	1273	98.88	1336	yes
secsyn	comp46465_c0_seq1	23069	62.8	35.48	1.72	Glyma06g21920.1	6e-156	1.14.13.11	Trans-cinnamate 4-monooxygenase.	2	5009	96.69	1057	97.03	1076	99.53	1057	yes
secsyn	comp46465_c2_seq1	60434	89.7	9.74	0.56	Glyma06g21920.1	5e-113	1.14.13.11	Trans-cinnamate 4-monooxygenase.	0	0	96.69	1057	97.03	1076	99.53	1057	yes
secsyn	comp46497_c0_seq2	2623	32.71	47.28	20.01	Glyma07g02460.1	0	2.3.1.166	2-alpha-hydroxytaxane 2-O-benzoyltransferase.	1	3335							yes
secsyn	comp46551_c0_seq1	122147	10.7	88.69	0.61	Glyma10g34720.1	9e-158	1.3.1.45	2'-hydroxyisoflavone Reductase.	4	2879							yes
secsyn	comp46726_c0_seq2	401	83.59	0.42	15.99	Glyma09g31810.1	0	1.14.13.11	Trans-cinnamate 4-monooxygenase.	1	370							yes
secsyn	comp46880_c0_seq1	8103	19.43	66.49	14.08	Glyma14g10290.2	0	1.14.99.7	Squalene Monooxygenase.	8	6813							yes
secsyn	comp47028_c0_seq2	861	74.41	17.2	8.4	Glyma07g06500.1	0	4.1.1.86	Diaminobutyrate Decarboxylase.	0	0	99.13	806	99.05	1267	99.38	806	yes
secsyn	comp47219_c0_seq1	3895	85.44	12.73	1.83	Glyma08g11570.1	0	1.14.13.11	Trans-cinnamate 4-monooxygenase.	1	5151							yes
secsyn	comp47508_c0_seq1	5154	8.59	77.01	14.39	Glyma07g04470.1	0	1.14.13.11	Trans-cinnamate 4-monooxygenase.	1	2783	98.36	1460	98.47	1441	99.1	1998	yes
secsyn	comp48019_c0_seq2	3707	30.03	51.86	18.1	Glyma11g20020.2	0	6.2.1.26	O-succinylbenzoate--CoA Ligase.	6	3723	97.57	2096	96.75	2059	98.26	2184	yes
secsyn	comp48341_c1_seq1	611	21.64	40.83	37.53	Glyma17g01610.1	4e-113	4.2.1.51	Prephenate Dehydratase.	7	5197							yes
secsyn	comp49023_c0_seq1	31305	57.23	30.15	12.62	Glyma03g03190.1	0	2.5.1.19	3-phosphoshikimate 1-carboxyvinyltransferase.	8	15491	98.73	2201	98.91	2196	99.28	2208	yes
secsyn	comp49294_c0_seq2	972	8.1	40.83	51.07	Glyma20g28620.1	3e-129	1.14.13.11	Trans-cinnamate 4-monooxygenase.	1	108							yes
secsyn	comp49386_c0_seq1	74533	41.88	56.92	1.2	Glyma01g44270.1	0	6.2.1.26	O-succinylbenzoate--CoA Ligase.	6	4705							yes
secsyn	comp49588_c0_seq1	5417	79.77	9.05	11.18	Glyma17g06850.1	6e-169	2.3.1.166	2-alpha-hydroxytaxane 2-O-benzoyltransferase.	0	0							yes
secsyn	comp49874_c0_seq1	6233	35.49	39.8	24.71	Glyma01g00430.1	0	5.4.99.7	Lanosterol Synthase.	18	22020	99.08	2831	98.97	2806	99.5	2804	yes
secsyn	comp49929_c0_seq1	81487	30.44	53.91	15.66	Glyma12g31770.1	0	4.2.1.92	Hydroperoxide Dehydratase.	2	3890							yes
secsyn	comp50161_c0_seq1	210	8.64	65.12	26.23	Glyma08g24160.2	0	5.4.99.7	Lanosterol Synthase.	7	6713	95.74	282	99.64	281	94.58	1254	yes
secsyn	comp50371_c0_seq3	445	73.44	9.3	17.25	Glyma07g09960.1	0	1.14.13.11	Trans-cinnamate 4-monooxygenase.	1	944							yes
secsyn	comp51076_c0_seq1	159	37.41	43.87	18.72	Glyma16g26520.1	0	1.14.13.11	Trans-cinnamate 4-monooxygenase.	2	1511							yes
secsyn	comp51091_c2_seq5	80283	31.4	67.66	0.94	Glyma17g37060.1	0	1.1.1.283	Methylglyoxal Reductase (NADPH-dependent).	5	4025	92.39	1459	89.97	1137	99.01	1416	yes
secsyn	comp51649_c1_seq1	1284	15.62	71.83	12.55	Glyma03g32510.2	0	4.1.1.86	Diaminobutyrate Decarboxylase.	11	4815							yes
secsyn	comp52237_c0_seq1	9857	13.16	51.9	34.94	Glyma16g26520.1	0	1.14.13.11	Trans-cinnamate 4-monooxygenase.	2	1511							yes
secsyn	comp52492_c1_seq2	1352	47.5	28.44	24.06	Glyma11g15750.2	2e-158	4.2.1.51	Prephenate Dehydratase.	11	8835							yes
secsyn	comp52663_c0_seq1	1447	0.25	95.12	4.63	Glyma09g31810.1	0	1.14.13.11	Trans-cinnamate 4-monooxygenase.	1	370							yes
secsyn	comp52711_c0_seq1	7451	7.98	60.21	31.81	Glyma13g44950.1	0	6.2.1.26	O-succinylbenzoate--CoA Ligase.	4	1165							yes
secsyn	comp52915_c0_seq2	1220	87.31	0.62	12.07	Glyma06g18560.1	0	1.14.13.11	Trans-cinnamate 4-monooxygenase.	1	765							yes
secsyn	comp53028_c0_seq2	5037	21.83	57.58	20.58	Glyma14g39840.1	0	6.2.1.26	O-succinylbenzoate--CoA Ligase.	5	4173							yes
secsyn	comp53141_c1_seq1	18746	17.25	59.08	23.67	Glyma03g27740.1	0	1.14.13.11	Trans-cinnamate 4-monooxygenase.	3	7855	98.32	1790	98.49	1793	99.15	2000	yes
secsyn	comp53167_c1_seq1	245	71.35	5.31	23.34	Glyma13g04710.1	0	1.14.13.11	Trans-cinnamate 4-monooxygenase.	1	2306							yes
secsyn	comp53194_c2_seq3	2622	29.44	58.89	11.68	Glyma09g26340.1	0	1.14.13.11	Trans-cinnamate 4-monooxygenase.	1	675							yes
secsyn	comp53279_c0_seq1	2678	78.13	6.25	15.62	Glyma01g24530.1	4e-138	1.2.1.41	Glutamate-5-semialdehyde Dehydrogenase.	8	2172							yes
secsyn	comp53279_c1_seq1	1059	37.88	15.71	46.41	Glyma03g12240.1	0	1.2.1.41	Glutamate-5-semialdehyde Dehydrogenase.	11	10377	99.16	1546	99.22	1546	98.65	1551	yes
secsyn	comp53340_c0_seq1	2091	72.99	25.6	1.4	Glyma01g37430.1	0	1.14.13.11	Trans-cinnamate 4-monooxygenase.	1	2993							yes
secsyn	comp53352_c0_seq1	1130	29.23	34.38	36.39	Glyma18g08940.1	0	1.14.13.11	Trans-cinnamate 4-monooxygenase.	1	1356							yes
secsyn	comp53451_c0_seq1	3238	43.74	24.67	31.59	Glyma01g20760.2	0	4.2.1.10	3-dehydroquinate Dehydratase.	10	13692	98.96	1827	99.15	1997	99.28	1936	yes
secsyn	comp53459_c0_seq1	20333	27.33	32.48	40.19	Glyma12g04220.3	0	2.5.1.21	Squalene Synthase.	13	11843							yes
secsyn	comp53604_c0_seq2	19236	43.87	45.85	10.29	Glyma07g21100.1	0	4.2.1.92	Hydroperoxide Dehydratase.	4	9866							yes
secsyn	comp53769_c0_seq1	523	29.34	31.99	38.67	Glyma14g10290.2	0	1.14.99.7	Squalene Monooxygenase.	5	2421							yes
secsyn	comp53881_c0_seq1	2824	39.16	11.81	49.03	Glyma07g02460.1	0	2.3.1.166	2-alpha-hydroxytaxane 2-O-benzoyltransferase.	1	3335	98.1	1684	96.69	1057	97.06	1055	yes
secsyn	comp54031_c0_seq1	13543	25.24	52.72	22.05	Glyma16g11580.1	0	1.14.13.11	Trans-cinnamate 4-monooxygenase.	1	1615	97.42	1974	98.13	1974	98.11	2120	yes
secsyn	comp54142_c0_seq1	24018	65.49	25.88	8.63	Glyma05g07870.1	0	1.3.1.78	Arogenate Dehydrogenase (NADP(+)).	2	530							yes
secsyn	comp54299_c0_seq1	1621	12.16	51.61	36.23	Glyma17g01610.1	0	4.2.1.51	Prephenate Dehydratase.	10	7631	99.18	736	99.18	1094	99.06	848	yes
secsyn	comp54421_c1_seq1	4507	47.11	31.99	20.9	Glyma18g02650.1	9e-126	1.3.1.78	Arogenate Dehydrogenase (NADP(+)).	5	1171							yes
secsyn	comp54430_c2_seq4	40580	1.51	98.03	0.45	Glyma01g20760.2	0	4.2.1.10	3-dehydroquinate Dehydratase.	10	13692							yes
secsyn	comp54662_c0_seq1	1604	37.18	28.66	34.17	Glyma17g14330.1	0	1.14.13.11	Trans-cinnamate 4-monooxygenase.	2	2923	98.36	1707	98.6	1713	99.09	1764	yes
secsyn	comp55034_c0_seq4	1150	32.83	23.42	43.75	Glyma12g36690.1	7e-160	1.3.1.77	Anthocyanidin Reductase.	3	2396	97.15	1124	87.28	983	89.2	1083	yes
secsyn	comp55210_c1_seq1	3923	9.91	33.73	56.37	Glyma16g01060.1	0	1.14.13.11	Trans-cinnamate 4-monooxygenase.	1	2196	98.33	1259	97.93	1259	96.21	1766	yes
secsyn	comp55618_c0_seq2	1546	25.17	68.66	6.16	Glyma07g39710.1	0	1.14.13.11	Trans-cinnamate 4-monooxygenase.	1	1732							yes
secsyn	comp55651_c0_seq1	2538	40.25	58.15	1.6	Glyma03g03670.1	0	1.14.13.11	Trans-cinnamate 4-monooxygenase.	1	918	91.63	1315	98.3	1937	92.02	1315	yes
secsyn	comp56258_c0_seq1	3393	21	42.61	36.38	Glyma19g22460.1	0	6.2.1.26	O-succinylbenzoate--CoA Ligase.	5	9973	98.21	1953	98.33	1914	99	1896	yes
secsyn	comp56397_c0_seq2	2899	26	31.73	42.27	Glyma17g04920.1	0	1.5.1.9	Saccharopine Dehydrogenase (NAD(+), L-glutamate-forming).	23	11634							yes
secsyn	comp56474_c0_seq2	11460	36.67	38.09	25.24	Glyma14g07120.1	0	1.2.1.41	Glutamate-5-semialdehyde Dehydrogenase.	16	5165	98.58	2817	98.81	2603	98.95	2658	yes
secsyn	comp56903_c0_seq3	19551	1.83	2.82	95.35	Glyma07g30440.1	0	1.14.99.7	Squalene Monooxygenase.	7	2174	99.34	1367	99.45	1267	99.73	1842	yes
secsyn	comp826804_c0_seq1	68	5.37	72.79	21.84	Glyma20g24810.1	0	1.14.13.11	Trans-cinnamate 4-monooxygenase.	1	1973							yes
